# Supplementary material for: Impacts of land-use change on biospheric carbon: an oriented benchmark using ORCHIDEE land surface model
Source: Copernicus journal article supplement (doi:10.5194/gmd-2024-42), 2024-03-13
Supplement: Supplementary file 1 [file gmd-2024-42-supplement.pdf]

## Supplementary Material

Table S1: Net primary production (NPP) sites from Luyssaert et al. (2007).

| ID | Site                  | Latitude (° N) | Longitude (° E) | Ecosystem type |
|----|-----------------------|----------------|-----------------|----------------|
| 1  | Aheden                | 64.20          | 19.50           | Forest         |
| 2  | Aubure (F)            | 48.20          | 7.18            | Forest         |
| 3  | Aubure (P)            | 48.20          | 7.18            | Forest         |
| 4  | Belgium               | 51.20          | 5.00            | Forest         |
| 5  | Bornhoved Alder       | 54.10          | 10.20           | Forest         |
| 6  | Bornhoved Beech       | 54.10          | 10.20           | Forest         |
| 7  | Brasschaat Oak        | 51.30          | 4.52            | Forest         |
| 8  | Brasschaat Pine       | 51.30          | 4.52            | Forest         |
| 9  | Collelongo            | 41.80          | 13.60           | Forest         |
| 10 | Dooary                | 53.00          | -7.30           | Forest         |
| 11 | Finland 1             | 60.50          | 23.90           | Forest         |
| 12 | Finland 2             | 60.50          | 23.90           | Forest         |
| 13 | Flakaliden C          | 64.10          | 19.50           | Forest         |
| 14 | Flakaliden I + F      | 64.10          | 19.50           | Forest         |
| 15 | France                | 48.40          | 2.70            | Forest         |
| 16 | Gribskov              | 56.00          | 12.30           | Forest         |
| 17 | Hainich               | 51.10          | 10.40           | Forest         |
| 18 | Hesse                 | 48.70          | 7.07            | Forest         |
| 19 | Hestehaven            | 56.30          | 10.50           | Forest         |
| 20 | Hungary               | 47.90          | 20.50           | Forest         |
| 21 | Ilomantsi 1           | 62.80          | 31.00           | Forest         |
| 22 | Ilomantsi 2           | 62.80          | 31.00           | Forest         |
| 23 | Ilomantsi 3           | 62.80          | 31.00           | Forest         |
| 24 | Ilomantsi 4           | 62.80          | 31.00           | Forest         |
| 25 | Ispina Krakow         | 50.10          | 20.40           | Forest         |
| 26 | Jädraas C             | 60.80          | 16.50           | Forest         |
| 27 | Jädraas I + F         | 60.80          | 16.50           | Forest         |
| 28 | Jezeri                | 50.50          | 13.50           | Forest         |
| 29 | Kannenbruch Alder/Ash | 53.80          | 10.60           | Forest         |
| 30 | Kannenbruch Beech     | 53.80          | 10.60           | Forest         |
| 31 | Kannenbruch Oak       | 53.80          | 10.60           | Forest         |
| 32 | Karelia_1             | 62.00          | 34.00           | Forest         |
| 33 | Karelia_10            | 62.00          | 34.00           | Forest         |
| 34 | Karelia_11            | 62.00          | 34.00           | Forest         |
| 35 | Karelia_12            | 62.00          | 34.00           | Forest         |
| 36 | Karelia_13            | 62.00          | 34.00           | Forest         |
| 37 | Karelia_14            | 62.00          | 34.00           | Forest         |
| 38 | Karelia_15            | 62.00          | 34.00           | Forest         |
| 39 | Karelia_16            | 62.00          | 34.00           | Forest         |
| 40 | Karelia_17            | 62.00          | 34.00           | Forest         |
| 41 | Karelia_2             | 62.00          | 34.00           | Forest         |
| 42 | Karelia_3             | 62.00          | 34.00           | Forest         |
| 43 | Karelia_4             | 62.00          | 34.00           | Forest         |
| 44 | Karelia_5             | 62.00          | 34.00           | Forest         |
| 45 | Karelia_6             | 62.00          | 34.00           | Forest         |

Continued on next page

Table S1 – continued from previous page

| <b>ID</b> | <b>Site</b>         | <b>Latitude (° N)</b> | <b>Longitude (° E)</b> | <b>Ecosystem type</b> |
|-----------|---------------------|-----------------------|------------------------|-----------------------|
| 46        | Karelia_7           | 62.00                 | 34.00                  | Forest                |
| 47        | Karelia_8           | 62.00                 | 34.00                  | Forest                |
| 48        | Karelia_9           | 62.00                 | 34.00                  | Forest                |
| 49        | Klosterhede         | 56.50                 | 8.40                   | Forest                |
| 50        | Kongalund B         | 56.00                 | 13.20                  | Forest                |
| 51        | Kongalund S         | 56.00                 | 13.20                  | Forest                |
| 52        | Kuusamo             | 66.40                 | 29.30                  | Forest                |
| 53        | Langarod            | 55.80                 | 13.90                  | Forest                |
| 54        | Lei-135+15          | 51.30                 | 10.40                  | Forest                |
| 55        | Lei-30              | 51.30                 | 10.40                  | Forest                |
| 56        | Lei-62              | 51.30                 | 10.40                  | Forest                |
| 57        | Lei-T-111           | 51.30                 | 10.40                  | Forest                |
| 58        | Linnebjerg          | 55.70                 | 13.30                  | Forest                |
| 59        | Loobos              | 52.20                 | 5.74                   | Forest                |
| 60        | Meathop             | 54.20                 | -2.90                  | Forest                |
| 61        | Monte di Mezzo      | 41.80                 | 14.90                  | Forest                |
| 62        | Nacetin             | 50.60                 | 13.30                  | Forest                |
| 63        | Oved                | 55.70                 | 13.60                  | Forest                |
| 64        | Popface alba        | 42.40                 | 11.80                  | Forest                |
| 65        | Popface euamericana | 42.40                 | 11.80                  | Forest                |
| 66        | Popface nigra       | 42.40                 | 11.80                  | Forest                |
| 67        | Schacht             | 50.10                 | 11.80                  | Forest                |
| 68        | Skogaby             | 56.50                 | 13.20                  | Forest                |
| 69        | Solling             | 51.80                 | 9.58                   | Forest                |
| 70        | Soroe               | 55.50                 | 11.60                  | Forest                |
| 71        | Tharandt            | 51.00                 | 13.60                  | Forest                |
| 72        | Tharandt 24         | 50.90                 | 13.50                  | Forest                |
| 73        | Tharandt 42         | 50.90                 | 13.50                  | Forest                |
| 74        | Tharandt 5          | 50.90                 | 13.50                  | Forest                |
| 75        | Tharandt 97         | 50.90                 | 13.50                  | Forest                |
| 76        | Virelles            | 50.10                 | 4.35                   | Forest                |
| 77        | Waldstein           | 50.20                 | 11.90                  | Forest                |
| 78        | Wet-T-57            | 50.50                 | 11.50                  | Forest                |
| 79        | Wytham Woods        | 51.50                 | -1.30                  | Forest                |

Table S2: Gross primary production (GPP) sites from Luyssaert et al. (2007).

| ID | Site                    | Latitude (° N) | Longitude (° E) | Ecosystem type |
|----|-------------------------|----------------|-----------------|----------------|
| 1  | Aberfeldy/Griffins      | 56.60          | -3.78           | Forest         |
| 2  | Bayreuth/Weiden Brunnen | 50.15          | 11.87           | Forest         |
| 3  | Bilos                   | 44.49          | -0.96           | Forest         |
| 4  | Bilos Clear             | 44.48          | 0.87            | Forest         |
| 5  | Bily Kriz Forest        | 49.50          | 18.54           | Forest         |
| 6  | Bornhoved Alder         | 54.10          | 10.23           | Forest         |
| 7  | Bornhoved Beech         | 54.10          | 10.23           | Forest         |
| 8  | Brasschaat              | 51.31          | 4.52            | Forest         |
| 9  | Castelporziano          | 41.71          | 12.38           | Forest         |
| 10 | Collelongo              | 41.85          | 13.59           | Forest         |
| 11 | Dooary                  | 52.95          | -7.25           | Forest         |
| 12 | El Saler                | 39.35          | -0.32           | Forest         |
| 13 | Espirra                 | 38.64          | -8.60           | Forest         |
| 14 | Flakaliden C            | 64.12          | 19.45           | Forest         |
| 15 | Fyedorovskoye           | 56.45          | 32.92           | Forest         |
| 16 | Hainich                 | 51.08          | 10.45           | Forest         |
| 17 | Hampshire               | 51.12          | -0.86           | Forest         |
| 18 | Hardwood                | 55.10          | -2.05           | Forest         |
| 19 | Hardwood Clear          | 55.10          | -2.05           | Forest         |
| 20 | Hardwood.21             | 55.10          | -2.05           | Forest         |
| 21 | Hardwood.7              | 55.10          | -2.05           | Forest         |
| 22 | Hesse                   | 48.67          | 7.07            | Forest         |
| 23 | Hyytiala                | 61.85          | 24.30           | Forest         |
| 24 | Hyytiala 12             | 61.85          | 24.30           | Forest         |
| 25 | Hyytiala 75             | 61.85          | 24.30           | Forest         |
| 26 | Hyytiala Clear          | 61.85          | 24.30           | Forest         |
| 27 | Ilomantsi Mekrijärvi    | 62.78          | 30.97           | Forest         |
| 28 | Kannenbruch Alder/Ash   | 53.78          | 10.60           | Forest         |
| 29 | Kannenbruch Beech       | 53.78          | 10.60           | Forest         |
| 30 | Kannenbruch Oak         | 53.78          | 10.60           | Forest         |
| 31 | La Majadas del Tietar   | 39.94          | -5.77           | Forest         |
| 32 | La Mandria              | 45.58          | 7.15            | Forest         |
| 33 | Lavarone                | 45.96          | 11.28           | Forest         |
| 34 | Le Bray                 | 44.72          | -0.77           | Forest         |
| 35 | Loobos                  | 52.17          | 5.74            | Forest         |
| 36 | Mehrstedt               | 51.28          | 10.66           | Forest         |
| 37 | Mitra                   | 38.54          | -8.00           | Forest         |
| 38 | Nonantola               | 44.69          | 11.09           | Forest         |
| 39 | Norunda                 | 60.09          | 17.48           | Forest         |
| 40 | Parco Ticino            | 45.20          | 9.06            | Forest         |
| 41 | Popface alba            | 42.36          | 11.80           | Forest         |
| 42 | Popface euamericana     | 42.36          | 11.80           | Forest         |
| 43 | Popface nigra           | 42.36          | 11.80           | Forest         |
| 44 | Puechabon               | 43.72          | 3.58            | Forest         |
| 45 | Renon                   | 46.59          | 11.43           | Forest         |
| 46 | Roccarespampami 1       | 42.41          | 11.93           | Forest         |
| 47 | San Rossore             | 43.73          | 10.28           | Forest         |

Continued on next page

**Table S2 – continued from previous page**

| <b>ID</b> | <b>Site</b>  | <b>Latitude (° N)</b> | <b>Longitude (° E)</b> | <b>Ecosystem type</b> |
|-----------|--------------|-----------------------|------------------------|-----------------------|
| 48        | Skyttorp1    | 60.13                 | 17.92                  | Forest                |
| 49        | Skyttorp2    | 60.13                 | 17.84                  | Forest                |
| 50        | Sodankylä    | 67.36                 | 26.64                  | Forest                |
| 51        | Solling      | 51.82                 | 9.58                   | Forest                |
| 52        | Soroe        | 55.49                 | 11.65                  | Forest                |
| 53        | Tharandt     | 50.96                 | 13.57                  | Forest                |
| 54        | Vielsalm     | 50.31                 | 6.00                   | Forest                |
| 55        | Wet-T-57     | 50.45                 | 11.46                  | Forest                |
| 56        | Wytham Woods | 51.46                 | -1.32                  | Forest                |

Table S3: Gross primary production (GPP) sites from FLUXNET and ICOS.

| ID | Site                  | Latitude (° N) | Longitude (° E) | Ecosystem type | Source        |
|----|-----------------------|----------------|-----------------|----------------|---------------|
| 1  | Sodankyla             | 67.36          | 26.64           | Forest         | FLUXNET       |
| 2  | Degero                | 64.18          | 19.56           | Grassland      | ICOS          |
| 3  | Hyytiala              | 61.85          | 24.29           | Forest         | FLUXNET       |
| 4  | Jokioinen             | 60.90          | 23.51           | Cropland       | FLUXNET       |
| 5  | Lettosuo              | 60.64          | 23.96           | Forest         | FLUXNET       |
| 6  | Norunda               | 60.09          | 17.48           | Forest         | ICOS          |
| 7  | Foulum                | 56.48          | 9.59            | Cropland       | FLUXNET       |
| 8  | Fyodorovskoye         | 56.46          | 32.92           | Forest         | FLUXNET       |
| 9  | Hyltemossa            | 56.10          | 13.42           | Forest         | ICOS          |
| 10 | Voulundgaard          | 56.04          | 9.16            | Cropland       | ICOS          |
| 11 | Enghave               | 55.69          | 12.19           | Grassland      | FLUXNET       |
| 12 | Soroe                 | 55.49          | 11.64           | Forest         | FLUXNET, ICOS |
| 13 | Horstermeer           | 52.24          | 5.07            | Grassland      | FLUXNET       |
| 14 | Loobos                | 52.17          | 5.74            | Forest         | FLUXNET       |
| 15 | Hohes Holz            | 52.09          | 11.22           | Forest         | ICOS          |
| 16 | Leinefelde            | 51.33          | 10.37           | Forest         | FLUXNET       |
| 17 | Brasschaat            | 51.31          | 4.52            | Forest         | FLUXNET, ICOS |
| 18 | Gebesee               | 51.10          | 10.91           | Cropland       | FLUXNET, ICOS |
| 19 | Hainich               | 51.08          | 10.45           | Forest         | FLUXNET       |
| 20 | Tharandt              | 50.96          | 13.57           | Forest         | FLUXNET, ICOS |
| 21 | Grillenburg           | 50.95          | 13.51           | Grassland      | FLUXNET       |
| 22 | Klingenberg           | 50.89          | 13.52           | Cropland       | FLUXNET       |
| 23 | Selhausen Juelich     | 50.87          | 6.45            | Cropland       | FLUXNET, ICOS |
| 24 | Selhausen             | 50.87          | 6.45            | Cropland       | FLUXNET       |
| 25 | Oberb.,renburg        | 50.79          | 13.72           | Forest         | FLUXNET       |
| 26 | Rollesbroich          | 50.62          | 6.30            | Grassland      | FLUXNET       |
| 27 | Lonze                 | 50.55          | 4.75            | Cropland       | FLUXNET, ICOS |
| 28 | Vielsalm              | 50.30          | 6.00            | Forest         | FLUXNET, ICOS |
| 29 | Bily Kriz forest      | 49.50          | 18.54           | Forest         | FLUXNET, ICOS |
| 30 | Bily Kriz grassland   | 49.49          | 18.54           | Grassland      | FLUXNET       |
| 31 | Lackenber             | 49.10          | 13.30           | Forest         | FLUXNET       |
| 32 | Grignon               | 48.84          | 1.95            | Cropland       | FLUXNET, ICOS |
| 33 | Lanzhot               | 48.68          | 16.95           | Forest         | ICOS          |
| 34 | Fontainebleau-Barbeau | 48.48          | 2.78            | Forest         | FLUXNET, ICOS |
| 35 | Laegern               | 47.48          | 8.36            | Forest         | FLUXNET       |
| 36 | Oensingen crop        | 47.29          | 7.73            | Cropland       | FLUXNET       |
| 37 | Oensingen grassland   | 47.29          | 7.73            | Grassland      | FLUXNET       |
| 38 | Chamau                | 47.21          | 8.41            | Grassland      | FLUXNET       |
| 39 | Frebel                | 47.12          | 8.54            | Grassland      | FLUXNET       |
| 40 | Davos                 | 46.82          | 9.86            | Forest         | FLUXNET       |
| 41 | Renon                 | 46.59          | 11.43           | Forest         | FLUXNET, ICOS |
| 42 | Monte Bondone         | 46.01          | 11.05           | Grassland      | FLUXNET       |
| 43 | Lavarone              | 45.96          | 11.28           | Forest         | FLUXNET       |
| 44 | Lavarone2             | 45.95          | 11.29           | Forest         | FLUXNET       |
| 45 | Torgnon               | 45.84          | 7.58            | Grassland      | FLUXNET       |
| 46 | Ispra ABC-IS          | 45.81          | 8.63            | Forest         | FLUXNET       |
| 47 | Parco Ticino forest   | 45.20          | 9.06            | Forest         | FLUXNET       |

Continued on next page

**Table S3 – continued from previous page**

| <b>ID Site</b>       | <b>Latitude (° N)</b> | <b>Longitude (° E)</b> | <b>Ecosystem type</b> | <b>Source</b> |
|----------------------|-----------------------|------------------------|-----------------------|---------------|
| 48 Le Bray           | 44.72                 | -0.77                  | Forest                | FLUXNET       |
| 49 Bilos             | 44.49                 | -0.96                  | Forest                | ICOS          |
| 50 Puechabon         | 43.74                 | 3.60                   | Forest                | FLUXNET, ICOS |
| 51 San Rossore 2     | 43.73                 | 10.29                  | Forest                | FLUXNET       |
| 52 San Rossore       | 43.73                 | 10.28                  | Forest                | FLUXNET       |
| 53 Lamasquere        | 43.50                 | 1.24                   | Cropland              | ICOS          |
| 54 Roccarespampani 1 | 42.41                 | 11.93                  | Forest                | FLUXNET       |
| 55 Roccarespampani 2 | 42.39                 | 11.92                  | Forest                | FLUXNET       |
| 56 Castel d'Asso2    | 42.38                 | 12.03                  | Cropland              | FLUXNET       |
| 57 Castel d'Asso1    | 42.38                 | 12.03                  | Forest                | FLUXNET       |
| 58 Castel d'Asso3    | 42.38                 | 12.02                  | Forest                | FLUXNET       |
| 59 Collelongo        | 41.85                 | 13.59                  | Forest                | FLUXNET       |
| 60 Castelporziano    | 41.71                 | 12.38                  | Forest                | FLUXNET       |
| 61 Castelporziano2   | 41.70                 | 12.36                  | Forest                | FLUXNET, ICOS |
| 62 Borgo Cioffi      | 40.52                 | 14.96                  | Cropland              | FLUXNET       |

Table S4: Gross primary production (GPP) sites from Campioli et al. (2015).

| <b>ID</b> | <b>Site</b>          | <b>Latitude (° N)</b> | <b>Longitude (° E)</b> | <b>Ecosystem type</b> |
|-----------|----------------------|-----------------------|------------------------|-----------------------|
| 1         | Aurade               | 43.55                 | 1.11                   | Cropland              |
| 2         | Lamasquere           | 43.50                 | 1.24                   | Cropland              |
| 3         | Grignon              | 48.84                 | 1.95                   | Cropland              |
| 4         | Lonzee_winter_wheat  | 50.55                 | 4.74                   | Cropland              |
| 5         | Lonzee_sugar_beet    | 50.55                 | 4.74                   | Cropland              |
| 6         | Lonzee_potato        | 50.55                 | 4.74                   | Cropland              |
| 7         | Avignon              | 43.92                 | 4.88                   | Cropland              |
| 8         | Lutjewad             | 53.40                 | 6.36                   | Cropland              |
| 9         | Oensingen            | 47.29                 | 7.73                   | Cropland              |
| 10        | Gebesee              | 51.10                 | 10.91                  | Cropland              |
| 11        | Risbyholm            | 55.53                 | 12.10                  | Cropland              |
| 12        | Beano1               | 46.00                 | 13.02                  | Cropland              |
| 13        | Klingenberg          | 50.89                 | 13.52                  | Cropland              |
| 14        | Dooary               | 52.95                 | -7.25                  | Forest                |
| 15        | Wytham_Woods         | 51.46                 | -1.32                  | Forest                |
| 16        | Puechabon            | 43.74                 | 3.60                   | Forest                |
| 17        | Lochristi            | 51.11                 | 3.85                   | Forest                |
| 18        | Hesse                | 48.67                 | 7.07                   | Forest                |
| 19        | Bornhoved_Alder      | 54.10                 | 10.23                  | Forest                |
| 20        | Bornhoved_Beech      | 54.10                 | 10.23                  | Forest                |
| 21        | Hainich              | 51.08                 | 10.45                  | Forest                |
| 22        | Kannenbruch_AlderAsh | 53.78                 | 10.60                  | Forest                |
| 23        | Kannenbruch_Beech    | 53.78                 | 10.60                  | Forest                |
| 24        | Kannenbruch_Oak      | 53.78                 | 10.60                  | Forest                |
| 25        | Caldaro              | 46.35                 | 11.27                  | Forest                |
| 26        | Soroe                | 55.49                 | 11.64                  | Forest                |
| 27        | Popface_alba         | 42.36                 | 11.80                  | Forest                |
| 28        | Popface_euamericana  | 42.36                 | 11.80                  | Forest                |
| 29        | Popface_nigra        | 42.36                 | 11.80                  | Forest                |
| 30        | Tharandt             | 50.96                 | 13.57                  | Forest                |
| 31        | Collelongo           | 41.85                 | 13.59                  | Forest                |
| 32        | Flakaliden_C         | 64.11                 | 19.46                  | Forest                |
| 33        | Beano2               | 46.00                 | 13.02                  | Grassland             |
| 34        | Grillenburg          | 50.95                 | 13.51                  | Grassland             |
| 35        | Kursk                | 51.67                 | 36.50                  | Grassland             |

Table S5: List of studies included in the meta-analysis for different land-use change (LUC) transitions: cropland-to-grassland (C-to-G), grassland-to-cropland (G-to-C), cropland-to-forest (C-to-F), grassland-to-forest (G-to-F), and forest-to-cropland (F-to-C). Three designs include P—paired plots, C—chronosequences, or M—mono-site samplings;  $N$  is the number of samples.

| ID | Country                                                                                                      | Design | N  | Depth (cm) | LUC transitions                         | Reference                        |
|----|--------------------------------------------------------------------------------------------------------------|--------|----|------------|-----------------------------------------|----------------------------------|
| 1  | Italy                                                                                                        | P      | 5  | 30         | G-to-F,<br>C-to-F                       | Alberti et al. (2011)            |
| 2  | Italy                                                                                                        | C      | 10 | 30         | G-to-F                                  | Alberti et al. (2008)            |
| 3  | Crete                                                                                                        | C      | 2  | 15         | C-to-G                                  | Apostolakis et al. (2017)        |
| 4  | France                                                                                                       | P      | 14 | 50         | F-to-C                                  | Arrouays and Pelissier (1994)    |
| 5  | England                                                                                                      | C      | 12 | 40         | G-to-F,<br>C-to-F                       | Ashwood et al. (2019)            |
| 6  | Italy                                                                                                        | C      | 8  | 30         | C-to-F                                  | Badalamenti et al. (2019)        |
| 7  | Denmark                                                                                                      | C      | 30 | 25         | C-to-G,<br>C-to-F                       | Bárcena et al. (2014)            |
| 8  | Ireland                                                                                                      | C      | 5  | 30         | G-to-F                                  | Black et al. (2009)              |
| 9  | Germany                                                                                                      | C      | 7  | 20         | C-to-G                                  | Breuer et al. (2006)             |
| 10 | Turkey                                                                                                       | P      | 1  | 20         | G-to-C                                  | Celik (2005)                     |
| 11 | Germany                                                                                                      | P      | 12 | 20         | C-to-G                                  | Chen et al. (2009)               |
| 12 | Italy                                                                                                        | C      | 20 | 30         | G-to-F,<br>C-to-G,<br>C-to-F            | Tommaso et al. (2018)            |
| 13 | Russia                                                                                                       | C      | 4  | 20         | C-to-G                                  | lopes de Gerenyu et al. (2008)   |
| 14 | Italy                                                                                                        | M      | 2  | 30         | G-to-C,<br>C-to-F                       | Del Galdo et al. (2003)          |
| 15 | Germany                                                                                                      | P      | 2  | 50         | C-to-G                                  | Don et al. (2009)                |
| 16 | Turkey                                                                                                       | P      | 1  | 70         | F-to-G                                  | Gol and Dengiz (2008)            |
| 17 | Russia                                                                                                       | M      | 1  | 60         | F-to-G                                  | Heikkinen et al. (2014)          |
| 18 | Germany                                                                                                      | M      | 3  | 60         | G-to-C,<br>F-to-G                       | John et al. (2005)               |
| 19 | France                                                                                                       | M      | 6  | 25         | F-to-C                                  | Jolivet et al. (1997)            |
| 20 | France                                                                                                       | M      | 13 | 20         | F-to-C                                  | Jolivet et al. (2003)            |
| 21 | Germany                                                                                                      | M      | 3  | 30         | C-to-G                                  | Hofmann-Schielle et al. (1999)   |
| 22 | Sweden                                                                                                       | C      | 9  | 20         | G-to-C,<br>C-to-G                       | Kätterer et al. (2008)           |
| 23 | Russia                                                                                                       | M      | 3  | 20         | C-to-G                                  | Larionova et al. (2003)          |
| 24 | Germany                                                                                                      | P      | 4  | 30         | G-to-C,<br>C-to-G                       | Leifeld and Kögel-Knabner (2005) |
| 25 | Italy                                                                                                        | P      | 3  | 40         | G-to-C                                  | Papini et al. (2011)             |
| 26 | Ireland                                                                                                      | P      | 2  | 30         | G-to-F                                  | Peichl et al. (2012)             |
| 27 | Austria, Denmark,<br>Germany, Ireland,<br>Italy, Lithuania,<br>Netherlands, Scotland,<br>Sweden, Switzerland | P      | 24 | 80         | C-to-G,<br>G-to-C,<br>G-to-F,<br>C-to-F | Poeplau and Don (2013)           |
| 28 | England                                                                                                      | P      | 7  | 69         | C-to-F,<br>C-to-G                       | Poulton et al. (2003)            |
| 29 | Spain                                                                                                        | M      | 12 | 30         | C-to-F                                  | Romanyà et al. (2000)            |

Continued on next page



Table S5 – continued from previous page

| ID | Country                         | Design | N  | Depth<br>(cm) | LUC transitions | Reference                  |
|----|---------------------------------|--------|----|---------------|-----------------|----------------------------|
| 30 | Germany                         | C      | 7  | 29            | G-to-C          | Springob et al. (2001)     |
| 31 | Italy, Germany                  | C      | 26 | 50            | G-to-C          | Thuille and Schulze (2006) |
| 32 | Sweden, Denmark,<br>Netherlands | C      | 60 | 25            | C-to-F          | Vesterdal et al. (2007)    |
| 33 | Ireland                         | P      | 42 | 30            | G-to-F          | Wellock et al. (2011)      |
| 34 | England                         | C      | 4  | 10            | F-to-F          | Zerva et al. (2005)        |

Table S6: The observed carbon response function (CRF) and the leave-one-out coefficient of determination ( $R^2$ ) measure for each land-use change (LUC) scenario in meta-analyses. ( $R^2$  values range from 0 to 1, where values closer to 1 indicate better predictive performance of the model.)

| LUC                                                        | ID                     | Model                                 | $R^2$ |
|------------------------------------------------------------|------------------------|---------------------------------------|-------|
| Cropland-to-grassland                                      | C-to-G                 | $0.85 \times \text{age} + 11.75$      | 0.57  |
| Grassland-to-cropland                                      | G-to-C                 | $-13.92 \times e^{\text{age}/133.80}$ | 0.62  |
| Grassland-to-forest (mineral soil or without forest floor) | G-to-F <sub>woFF</sub> | $-0.10 \times \text{age} + 3.54$      | 0.89  |
| Grassland to forest (with forest floor)                    | G-to-F <sub>wFF</sub>  | $0.03 \times \text{age} + 2.24$       | 0.58  |
| Cropland-to-forest (mineral soil)                          | C-to-F <sub>woFF</sub> | $0.74 \times \text{age} - 5.78$       | 0.99  |
| Cropland-to-forest (with forest floor)                     | C-to-F <sub>wFF</sub>  | $1.09 \times \text{age} + 3.54$       | 0.52  |
| Forest-to-cropland (mineral soil)                          | F-to-C <sub>woFF</sub> | $-1.10 \times \text{age} - 16.03$     | 0.98  |

Table S7: The leave-one-out coefficient of determination ( $R^2$ ) and root mean square error (RMSE in  $kg\ m^{-2}$ ) between the random forest regression and model bias for each land-use change (LUC) scenario. Results with negative  $R^2$ , indicating poor regression, are not shown. Two distinct forest types, namely temperate broadleaf summergreen (TeBS) and temperate needleleaf evergreen (TeNE), are considered for the forest sites.

| Forest type | LUC                                                        | ID                     | $R^2$ | RMSE |
|-------------|------------------------------------------------------------|------------------------|-------|------|
|             | Cropland-to-grassland                                      | C-to-G                 | 0.13  | 1.25 |
|             | Grassland-to-cropland                                      | G-to-C                 | 0.44  | 1.08 |
| TeBS        | Grassland to forest (mineral soil or without forest floor) | G-to-F <sub>woFF</sub> | 0.19  | 3.59 |
|             | Grassland-to-forest (with forest floor)                    | G-to-F <sub>wFF</sub>  | -     | -    |
|             | Cropland-to-forest (mineral soil)                          | C-to-F <sub>woFF</sub> | 0.26  | 1.92 |
|             | Cropland-to-forest (with forest floor)                     | C-to-F <sub>wFF</sub>  | -     | -    |
|             | Forest-to-cropland (mineral soil)                          | F-to-C <sub>woFF</sub> | 0.11  | 3.03 |
| TeNE        | Grassland to forest (mineral soil or without forest floor) | G-to-F <sub>woFF</sub> | 0.18  | 3.58 |
|             | Grassland-to-forest (with forest floor)                    | G-to-F <sub>wFF</sub>  | -     | -    |
|             | Cropland-to-forest (mineral soil)                          | C-to-F <sub>woFF</sub> | 0.19  | 2.03 |
|             | Cropland-to-forest (with forest floor)                     | C-to-F <sub>wFF</sub>  | -     | -    |
|             | Forest-to-cropland (mineral soil)                          | F-to-C <sub>woFF</sub> | 0.18  | 3.14 |

## References

- Alberti, G., Peressotti, A., Piussi, P., and Zerbi, G.: Forest ecosystem carbon accumulation during a secondary succession in the Eastern Prealps of Italy, *Forestry: An International Journal of Forest Research*, 81, 1–11, <https://doi.org/10.1093/forestry/cpm026>, 2008.
- Alberti, G., Leronni, V., Piazzini, M., Petrella, F., Mairota, P., Peressotti, A., Piussi, P., Valentini, R., Gristina, L., La Mantia, T., Novara, A., and Rühl, J.: Impact of woody encroachment on soil organic carbon and nitrogen in abandoned agricultural lands along a rainfall gradient in Italy, *Regional Environmental Change*, 11, 917–924, <https://doi.org/10.1007/s10113-011-0229-6>, 2011.
- Apostolakis, A., Panakoulia, S., Nikolaidis, N. P., and Paranychianakis, N. V.: Shifts in soil structure and soil organic matter in a chronosequence of set-aside fields, *Soil and Tillage Research*, 174, 113–119, <https://doi.org/https://doi.org/10.1016/j.still.2017.07.004>, 2017.
- Arrouays, D. and Pelissier, P.: Changes in carbon storage in temperate humic loamy soils after forest clearing and continuous corn cropping in France, *Plant and Soil*, 160, 215–223, <https://doi.org/10.1007/BF00010147>, 1994.

Table S8: Correlation (COR) and root mean square error (RMSE in  $kg\ m^{-2}$ ) between observed and simulated soil organic carbons ( $SOC_{LUCAS\ topsoil}$  and  $SOC_{derived\ ORC}$ ) at different grid scales (from  $0.5^\circ \times 0.5^\circ$  to  $3^\circ \times 3^\circ$  cells), for three groups of vegetation (forest, grass, and crop).

| Grid scale                   | Forest |                          |              | Grass |                          |              | Crop |                          |              |
|------------------------------|--------|--------------------------|--------------|-------|--------------------------|--------------|------|--------------------------|--------------|
|                              | COR    | RMSE<br>( $kg\ m^{-2}$ ) | rRMSE<br>(%) | COR   | RMSE<br>( $kg\ m^{-2}$ ) | rRMSE<br>(%) | COR  | RMSE<br>( $kg\ m^{-2}$ ) | rRMSE<br>(%) |
| $0.5^\circ \times 0.5^\circ$ | 0.17   | 2.82                     | 59.15        | 0.53  | 1.57                     | 39.38        | 0.42 | 1.18                     | 35.98        |
| $1^\circ \times 1^\circ$     | 0.26   | 2.57                     | 52.87        | 0.56  | 1.43                     | 35.41        | 0.47 | 1.04                     | 30.78        |
| $2^\circ \times 2^\circ$     | 0.39   | 2.48                     | 48.21        | 0.52  | 1.31                     | 31.77        | 0.54 | 0.91                     | 26.6         |
| $3^\circ \times 3^\circ$     | 0.45   | 2.36                     | 45.59        | 0.68  | 1.14                     | 27.43        | 0.59 | 0.88                     | 25.39        |

Ashwood, F., Watts, K., Park, K., Fuentes-Montemayor, E., Benham, S., and Vanguelova, E. I.: Woodland restoration on agricultural land: long-term impacts on soil quality, *Restoration Ecology*, 27, 1381–1392, <https://doi.org/https://doi.org/10.1111/rec.13003>, 2019.

Badalamenti, E., Battipaglia, G., Gristina, L., Novara, A., Rühl, J., Sala, G., Sapienza, L., Valentini, R., and La Mantia, T.: Carbon stock increases up to old growth forest along a secondary succession in Mediterranean island ecosystems, *PLOS ONE*, 14, 1–13, <https://doi.org/10.1371/journal.pone.0220194>, 2019.

Black, K., Byrne, K. A., Mencuccini, M., Tobin, B., Nieuwenhuis, M., Reidy, B., Bolger, T., Saiz, G., Green, C., Farrell, E. T., and Osborne, B.: Carbon stock and stock changes across a Sitka spruce chronosequence on surface-water gley soils, *Forestry: An International Journal of Forest Research*, 82, 255–272, <https://doi.org/10.1093/forestry/cpp005>, 2009.

Breuer, L., Huisman, J., Keller, T., and Frede, H.-G.: Impact of a conversion from cropland to grassland on C and N storage and related soil properties: Analysis of a 60-year chronosequence, *Geoderma*, 133, 6–18, <https://doi.org/https://doi.org/10.1016/j.geoderma.2006.03.033>, advances in landscape-scale soil research, 2006.

Bárcena, T. G., Gundersen, P., and Vesterdal, L.: Afforestation effects on SOC in former cropland: oak and spruce chronosequences resampled after 13 years, *Global Change Biology*, 20, 2938–2952, <https://doi.org/https://doi.org/10.1111/gcb.12608>, 2014.

Campoli, M., Vicca, S., Luyssaert, S., Bilcke, J., Ceschia, E., Chapin III, F. S., Ciais, P., Fernández-Martínez, M., Malhi, Y., Obersteiner, M., Olefeldt, D., Papale, D., Piao, S. L., Peñuelas, J., Sullivan, P. F., Wang, X., Zenone, T., and Janssens, I. A.: Biomass production efficiency controlled by management in temperate and boreal ecosystems, *Nature Geoscience*, 8, 843–846, <https://doi.org/10.1038/ngeo2553>, 2015.

Celik, I.: Land-use effects on organic matter and physical properties of soil in a southern Mediterranean highland of Turkey, *Soil and Tillage Research*, 83, 270–277, <https://doi.org/https://doi.org/10.1016/j.still.2004.08.001>, 2005.

Chen, H., Marhan, S., Billen, N., and Stahr, K.: Soil organic-carbon and total nitrogen stocks as affected by different land uses in Baden-Württemberg (southwest Germany), *Journal of Plant Nutrition and Soil Science*, 172, 32–42, <https://doi.org/https://doi.org/10.1002/jpln.200700116>, 2009.

Del Galdo, I., Six, J., Peressotti, A., and Francesca Cotrufo, M.: Assessing the impact of land-use change on soil C sequestration in agricultural soils by means of organic matter fractionation and stable C isotopes, *Global Change Biology*, 9, 1204–1213, <https://doi.org/https://doi.org/10.1046/j.1365-2486.2003.00657.x>, 2003.

- Don, A., Scholten, T., and Schulze, E.-D.: Conversion of cropland into grassland: Implications for soil organic-carbon stocks in two soils with different texture, *Journal of Plant Nutrition and Soil Science*, 172, 53–62, <https://doi.org/https://doi.org/10.1002/jpln.200700158>, 2009.
- Gol, C. and Dengiz, O.: Effect of modifying land cover and long-term agricultural practices on the soil characteristics in native forest-land, *J Environ Biol*, 29, 677–682, 2008.
- Heikkinen, J., Kurganova, I., Lopes de Gerenyu, V., Palosuo, T., and Regina, K.: Changes in soil carbon stock after cropland conversion to grassland in Russian temperate zone: measurements versus model simulation, *Nutrient Cycling in Agroecosystems*, 98, 97–106, <https://doi.org/10.1007/s10705-014-9599-8>, 2014.
- Hofmann-Schielle, C., Jug, A., Makeschin, F., and Rehfuss, K.: Short-rotation plantations of balsam poplars, aspen and willows on former arable land in the Federal Republic of Germany. I. Site–growth relationships, *Forest Ecology and Management*, 121, 41–55, [https://doi.org/https://doi.org/10.1016/S0378-1127\(98\)00555-6](https://doi.org/https://doi.org/10.1016/S0378-1127(98)00555-6), 1999.
- John, B., Yamashita, T., Ludwig, B., and Flessa, H.: Storage of organic carbon in aggregate and density fractions of silty soils under different types of land use, *Geoderma*, 128, 63–79, <https://doi.org/https://doi.org/10.1016/j.geoderma.2004.12.013>, mechanisms and regulation of organic matter stabilisation in soils, 2005.
- Jolivet, C., Arrouays, D., Andreux, F., and Lévêque, J.: Soil organic carbon dynamics in cleared temperate forest spodosols converted to maize cropping, *Plant and Soil*, 191, 225–231, <https://doi.org/10.1023/A:1004294822799>, 1997.
- Jolivet, C., Arrouays, D., Lévêque, J., Andreux, F., and Chenu, C.: Organic carbon dynamics in soil particle-size separates of sandy Spodosols when forest is cleared for maize cropping, *European Journal of Soil Science*, 54, 257–268, <https://doi.org/https://doi.org/10.1046/j.1365-2389.2003.00541.x>, 2003.
- Kätterer, T., Andersson, L., Andrén, O., and Persson, J.: Long-term impact of chronosequential land use change on soil carbon stocks on a Swedish farm, *Nutrient Cycling in Agroecosystems*, 81, 145–155, <https://doi.org/10.1007/s10705-007-9156-9>, 2008.
- Larionova, A. A., Rozanova, L. N., Yevdokimov, I. V., Yermolayev, A. M., Kurganova, I. N., and Blagodatsky, S. A.: Land-use change and management effects on carbon sequestration in soils of Russia’s South Taiga zone, *Tellus B*, 55, 331–337, <https://doi.org/https://doi.org/10.1034/j.1600-0889.2003.00042.x>, 2003.
- Leifeld, J. and Kögel-Knabner, I.: Soil organic matter fractions as early indicators for carbon stock changes under different land-use?, *Geoderma*, 124, 143–155, <https://doi.org/https://doi.org/10.1016/j.geoderma.2004.04.009>, 2005.
- lopes de Gerenyu, V., Kurganova, I., and Kuzyakov, Y.: Carbon pool and sequestration in former arable Chernozems depending on restoration period, *Ekologija*, 54, 232–238, <https://doi.org/10.2478/v10055-008-0034-9>, 2008.
- Luyssaert, S., Inglima, I., Jung, M., Richardson, A., Reichsteins, M., Papale, D., Piao, S., Schulzes, E., Wingate, L., Matteucci, G., Aragao, L., Aubinet, M., Beers, C., Bernhoffer, C., Black, K., Bonal, D., Bonnefond, J., Chambers, J., Ciais, P., Cook, B., Davis, K., Dolman, A., Gielen, B., Goulden, M., Grace, J., Granier, A., Grelle, A., Griffis, T., Grunewald, T., Guidolotti, G., Hanson, P., Harding, R., Hollinger, D., Hutya, L., Kolar, P., Kruijt, B., Kutsch, W., Lagergren, F., Laurila, T., Law, B., Le Maire, G., Lindroth, A.,

- Loustau, D., Malhi, Y., Mateus, J., Migliavacca, M., Misson, L., Montagnani, L., Moncrieff, J., Moors, E., Munger, J., Nikinmaa, E., Ollinger, S., Pita, G., Rebmann, C., Roupard, O., Saigusa, N., Sanz, M., Seufert, G., Sierra, C., Smith, M., Tang, J., Valentini, R., Vesala, T., and Janssens, I.: CO<sub>2</sub> balance of boreal, temperate, and tropical forests derived from a global database, *Global Change Biology*, 13, 2509–2537, <https://doi.org/https://doi.org/10.1111/j.1365-2486.2007.01439.x>, 2007.
- Papini, R., Valboa, G., Favilli, F., and L’Abate, G.: Influence of land use on organic carbon pool and chemical properties of Vertic Cambisols in central and southern Italy, *Agriculture, Ecosystems and Environment*, 140, 68–79, <https://doi.org/https://doi.org/10.1016/j.agee.2010.11.013>, 2011.
- Peichl, M., Leava, N. A., and Kiely, G.: Above- and belowground ecosystem biomass, carbon and nitrogen allocation in recently afforested grassland and adjacent intensively managed grassland, *Plant and Soil*, 350, 281–296, <https://doi.org/10.1007/s11104-011-0905-9>, 2012.
- Poeplau, C. and Don, A.: Sensitivity of soil organic carbon stocks and fractions to different land-use changes across Europe, *Geoderma*, 192, 189–201, <https://doi.org/https://doi.org/10.1016/j.geoderma.2012.08.003>, 2013.
- Poulton, P. R., Pye, E., Hargreaves, P. R., and Jenkinson, D. S.: Accumulation of carbon and nitrogen by old arable land reverting to woodland, *Global Change Biology*, 9, 942–955, <https://doi.org/https://doi.org/10.1046/j.1365-2486.2003.00633.x>, 2003.
- Romanyà, J., Cortina, J., Falloon, P., Coleman, K., and Smith, P.: Modelling changes in soil organic matter after planting fast-growing *Pinus radiata* on Mediterranean agricultural soils, *European Journal of Soil Science*, 51, 627–641, <https://doi.org/https://doi.org/10.1111/j.1365-2389.2000.00343.x>, 2000.
- Springob, G., Brinkmann, S., Engel, N., Kirchmann, H., and Böttcher, J.: Organic C levels of Ap horizons in North German Pleistocene sands as influenced by climate, texture, and history of land-use, *Journal of Plant Nutrition and Soil Science*, 164, 681–690, [https://doi.org/https://doi.org/10.1002/1522-2624\(200112\)164:6;681::AID-JPLN681;3.0.CO;2-V](https://doi.org/https://doi.org/10.1002/1522-2624(200112)164:6;681::AID-JPLN681;3.0.CO;2-V), 2001.
- Thuille, A. and Schulze, E.-D.: Carbon dynamics in successional and afforested spruce stands in Thuringia and the Alps, *Global Change Biology*, 12, 325–342, <https://doi.org/https://doi.org/10.1111/j.1365-2486.2005.01078.x>, 2006.
- Tommaso, C., Emanuele, B., Guido, P., Lucia, P., Vincenza, C. M., and Riccardo, V.: Soil organic carbon pool’s contribution to climate change mitigation on marginal land of a Mediterranean montane area in Italy, *Journal of Environmental Management*, 218, 593–601, <https://doi.org/https://doi.org/10.1016/j.jenvman.2018.04.093>, 2018.
- Vesterdal, L., Rosenqvist, L., Van Der Salm, C., Hansen, K., Groenenberg, B. J., and Johansson, M. B.: Carbon Sequestration in Soil and Biomass Following Afforestation: Experiences from Oak and Norway Spruce Chronosequences in Denmark, Sweden and the Netherlands, pp. 19–51, Springer Netherlands, [https://doi.org/10.1007/1-4020-4568-9\\_2](https://doi.org/10.1007/1-4020-4568-9_2), 2007.
- Wellock, M. L., LaPerle, C. M., and Kiely, G.: What is the impact of afforestation on the carbon stocks of Irish mineral soils?, *Forest Ecology and Management*, 262, 1589–1596, <https://doi.org/https://doi.org/10.1016/j.foreco.2011.07.007>, 2011.
- Zerva, A., Ball, T., Smith, K. A., and Mencuccini, M.: Soil carbon dynamics in a Sitka spruce (*Picea sitchensis* (Bong.) Carr.) chronosequence on a peaty gley, *Forest Ecology and Management*, 205, 227–240, <https://doi.org/https://doi.org/10.1016/j.foreco.2004.10.035>, 2005.

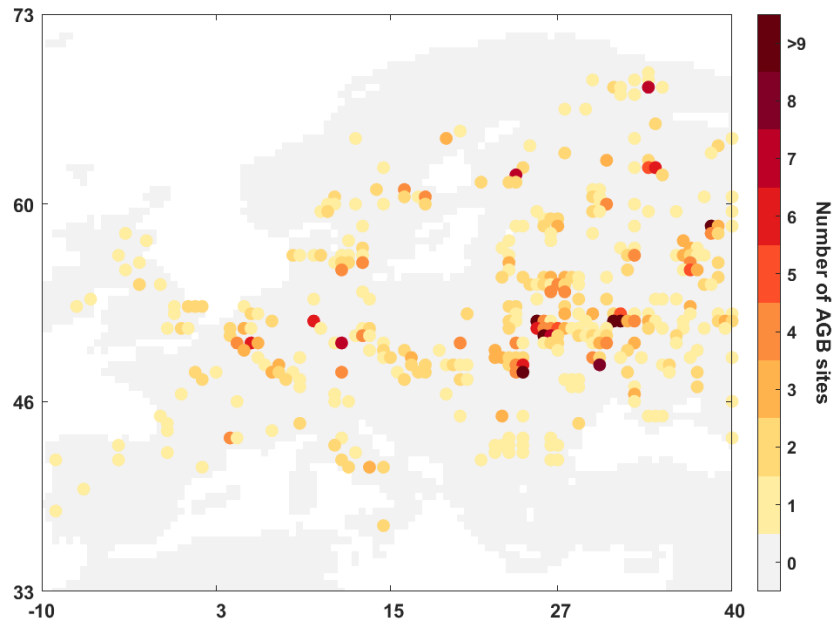

Figure S1: Map showing the observed above-ground biomass (AGB) sites included in the study.

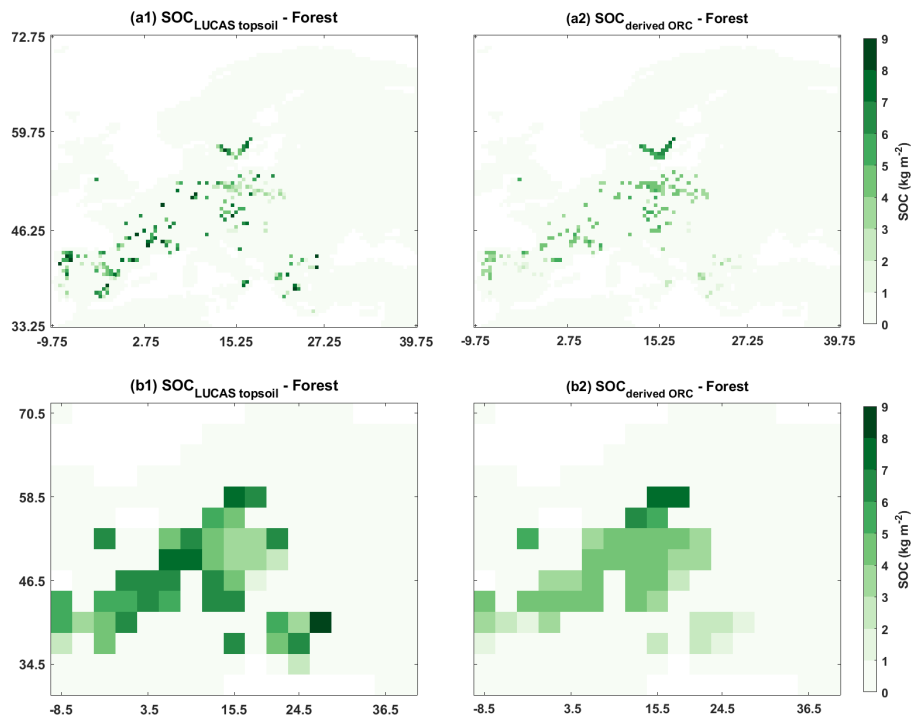

Figure S2: Maps showing the comparison between soil organic carbon of LUCAS topsoil and corresponding ORCHIDEE values ( $SOC_{LUCAS\ topsoil}$  (a1,b1) and  $SOC_{derived\ ORC}$  (a2,b2), in  $kg\ m^{-2}$ ) at different grid scales ( $0.5^\circ \times 0.5^\circ$  (a1, a2) and  $3^\circ \times 3^\circ$  (b1,b2)) for forest sites.

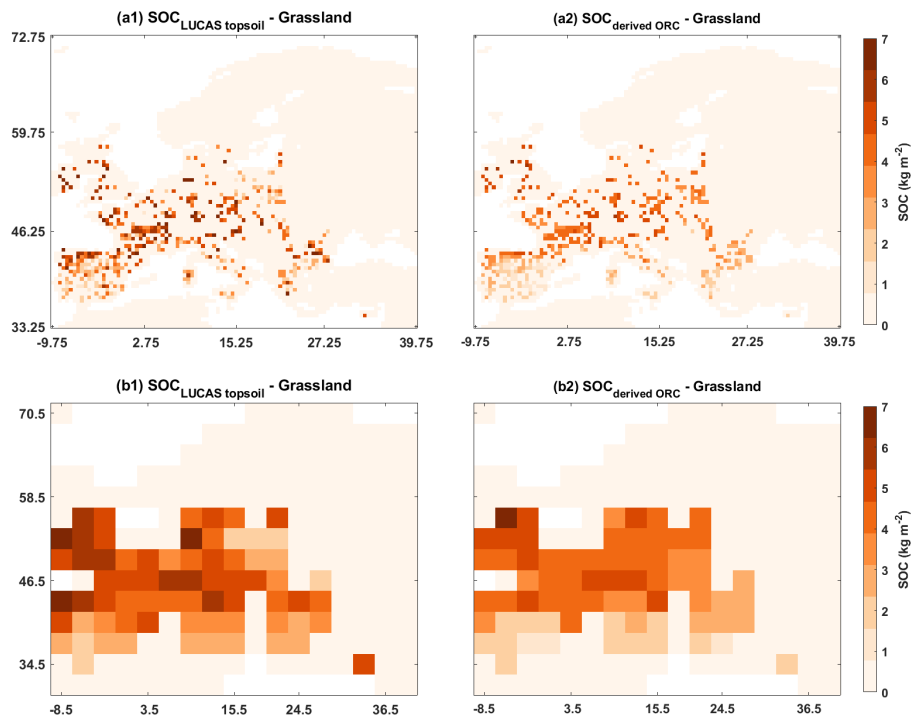

Figure S3: Same as Fig. S2, but for grassland sites.

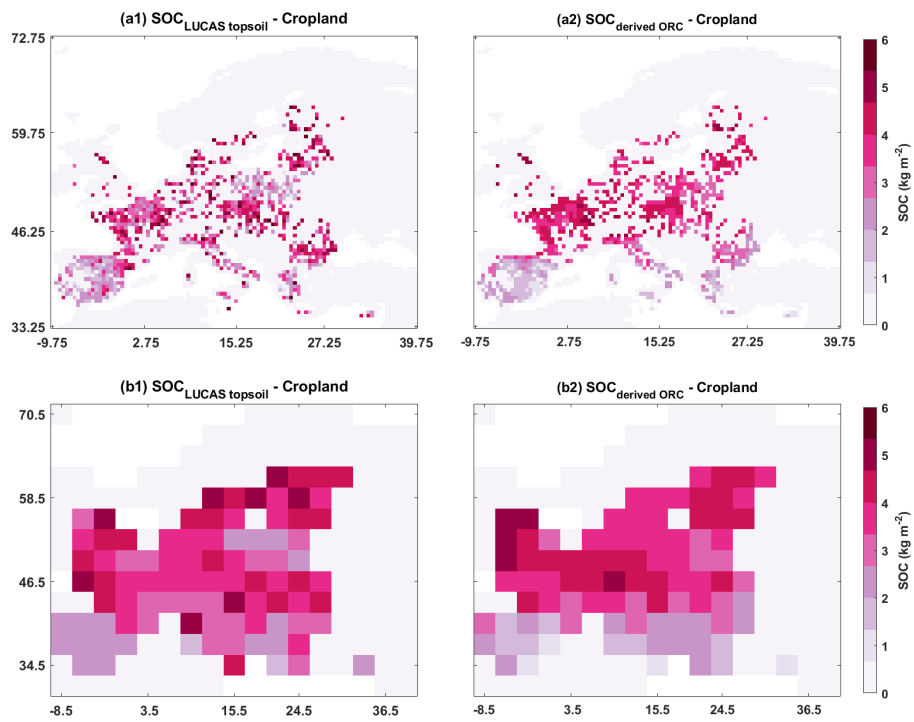

Figure S4: Same as Fig. S2, but for cropland sites.
